# Supplementary material
Source: HighWire-hosted journal article supplement (https://erj.ersjournals.com/highwire/filestream/113471/field_highwire_adjunct_files/0/Supplementarymateria_revision.pdf)

# **Adrenomedullin refines mortality prediction by the BODE index in COPD – The “BODE-A” index**

Daiana Stolz, M.D.,<sup>1</sup> Kostantinos Kostikas, M.D.,<sup>2</sup> Francesco Blasi, M.D.,<sup>3</sup>  
Wim Boersma, M.D.,<sup>4</sup> Branislava Milenkovic, M.D.,<sup>5</sup> Alicia Lacoma, Ph.D.,<sup>6</sup>  
Renaud Louis, M.D.,<sup>7</sup> Joachim G. Aerts, M.D.,<sup>8</sup> Tobias Welte, M.D.,<sup>9</sup>  
Antoni Torres, M.D.,<sup>10</sup> Gernot G.U. Rohde, M.D.,<sup>11</sup> Lucas Boeck, M.D.,<sup>1</sup>  
Janko Rakic, M.D.,<sup>1</sup> Andreas Scherr, M.D.,<sup>1</sup> Sabine Hertel, Ph.D.,<sup>12</sup>  
Sven Giersdorf, Ph.D.,<sup>12</sup> and Michael Tamm, M.D.<sup>1</sup>

## **Online Data Supplement**

## **METHODS**

### **Study Design: Inclusion Of Other Plasma Biomarkers Besides**

#### **Proadrenomedullin**

Besides proadrenomedullin, we examined the relationships of three other plasma biomarkers, procalcitonin, copeptin, and pro-atrial natriuretic protein, with 1-year and 2-year mortality in the analyzed cohort (N = 549). Observations from single-center studies of these analytes in adverse outcome prediction in chronic obstructive pulmonary disease (COPD) and other illnesses, summarized in the “Other biomarkers: description and use in adverse outcome prediction” subsection below, provided the rationale for inclusion of procalcitonin, copeptin, and pro-atrial natriuretic peptide in the present study.

Each biomarker was studied alone and together with either the Body-mass, airflow Obstruction, Dyspnea and Exercise capacity index (BODE)<sup>1</sup> or the non-6-minute-walk test (6MWT) BODE components (BOD). The identical univariate and multivariate Cox regression proportional-hazard regression modelling techniques were used to examine these relationships, and the data are reported in the same fashion, as are described in the “Statistics” subsection of the “Methods” section of the main manuscript.

#### **Other Biomarkers: Description And Previous Use In Adverse Outcome**

##### **Prediction**

Procalcitonin is the stable prohormone of the regulator of calcium metabolism, calcitonin. Procalcitonin production and secretion are markedly up-regulated in response to bacterial toxins and cytokines expressed due to systemic bacterial infection, but are down-regulated by cytokines evoked by viral infection.<sup>2</sup> Therefore, procalcitonin has gained widespread use to help guide whether to start or how long

to continue antibiotic therapy, or both decisions, in patients with lower respiratory infections,<sup>3,4</sup> including chronic obstructive pulmonary disease (COPD) exacerbations<sup>5</sup> and sepsis.<sup>3</sup>

Copeptin is the stable co-terminal fragment of the prohormone of arginine vasopressin, and as such, a surrogate for the mature hormone. The primary function of arginine vasopressin is fluid regulation, but levels of this mature hormone are elevated in response to systemic stress, including acute myocardial infarction,<sup>6</sup> hemorrhage, and sepsis.<sup>7</sup>

Pro-atrial natriuretic peptide is the mid-regional fragment of the prohormone of, and thus a surrogate for, atrial natriuretic peptide, a biomarker of cardiovascular stress.<sup>8</sup> The relationship of admission procalcitonin and copeptin measurements with 14-day and 6-month clinical failure, including mortality, previously was examined in a single-center observational study<sup>9</sup> of inpatients with COPD exacerbation. The study found copeptin, but not procalcitonin, to have predictive value with respect to 6-month clinical failure.<sup>9</sup> Significantly higher mean pro-atrial natriuretic peptide concentrations were observed in 2-week non-survivors than in 2-week survivors in a large single-center study in patients with lower respiratory tract infections including those with COPD exacerbations, who comprised 11% of the study sample.<sup>10</sup>

### **Plasma Biomarker Measurement**

Blood for proadrenomedullin, procalcitonin, copeptin, and pro-atrial natriuretic peptide measurements was collected via indwelling venous catheter into vacutainer tubes, which were centrifuged at 3000 x g for 10-15 minutes to obtain plasma. Samples were stored at -80°C until analyzed. For all four analytes, quantification was performed in duplicate within one run in a central, accredited laboratory by technicians unaware of patients' clinical data, using automated sandwich

immunoassays based on time-resolved amplified cryptate emission technology (KRYPTOR®; Thermo Scientific Biomarkers, Hennigsdorf, Germany). The procalcitonin assay had a lower detection limit of 0.02 µg/L and functional assay sensitivity of 0.06 µg/L, i.e., 3–10-fold over mean values in healthy volunteers.<sup>11</sup> The copeptin assay had a 0.4 pmol/L lower detection limit and an <1 pmol/L functional assay sensitivity.<sup>12</sup> The pro-atrial natriuretic peptide assay had a 4.3 pmol/L lower detection limit and a 11.0 pmol/L functional sensitivity, with an interassay coefficient of variation <20%.<sup>8</sup>

For each studied plasma biomarker, measurements below the limit of quantitation were imputed to that value.

#### **Outcome Assessment and Statistics: Additional Information**

Otherwise undeterminable death dates were imputed to halfway between the latest study visit and the date that the investigator learned of the death. All statistical analyses were performed using R version 2.5.1 (<http://www.r-project.org>) or Statistical Package for the Social Sciences version 19.0 (IBM, Armonk, NY).

## Online Data Supplement References

1. Celli BR, Cote CG, Marin JM, Casanova C, Montes de Oca M, Mendez RA, Pinto Plata V, Cabral HJ. The body-mass index, airflow obstruction, dyspnea, and exercise capacity index in chronic obstructive pulmonary disease. *N Engl J Med* 2004;350:1005–1012.
2. Becker KL, Nylen ES, White JC, Muller B, Snider RH, Jr. Clinical review 167: Procalcitonin and the calcitonin gene family of peptides in inflammation, infection, and sepsis: a journey from calcitonin back to its precursors. *J Clin Endocrinol Metab* 2004;89:1512–1525.
3. Schuetz P, Chiappa V, Briel M, Greenwald JL. Procalcitonin algorithms for antibiotic therapy decisions: a systematic review of randomized controlled trials and recommendations for clinical algorithms. *Arch Intern Med* 2011;171:1322-1331.
4. Stolz D, Smyrniotis N, Eggimann P, Pargger H, Thakkar N, Siegemund M, Marsch S, Azzola A, Rakic J, Mueller B, Tamm M. Procalcitonin for reduced antibiotic exposure in ventilator-associated pneumonia: a randomised study. *Eur Respir J* 2009;34:1364-1375.
5. Stolz D, Christ-Crain M, Bingisser R, Leuppi J, Miedinger D, Muller C, Huber P, Muller B, Tamm M. Antibiotic treatment of exacerbations of COPD: a randomized, controlled trial comparing procalcitonin-guidance with standard therapy. *Chest* 2007;131:9-19.
6. Keller T, Tzikas S, Zeller T, Czyz E, Lillpopp L, Ojeda FM, Roth A, Bickel C, Baldus S, Sinning CR, *et al.* Copeptin improves early diagnosis of acute myocardial infarction. *J Am Coll Cardiol* 2010;55:2096–2106.

7. Morgenthaler NG, Muller B, Struck J, Bergmann A, Redl H, Christ-Crain M. Copeptin, a stable peptide of the arginine vasopressin precursor, is elevated in hemorrhagic and septic shock. *Shock* 2007;28:219-226.
8. Morgenthaler NG, Struck J, Thomas B, Bergmann A. Immunoluminometric assay for the midregion of pro-atrial natriuretic peptide in human plasma. *Clin Chem* 2004;50:234-236.
9. Stolz D, Christ-Crain M, Morgenthaler NG, Leuppi J, Miedinger D, Bingisser R, Muller C, Struck J, Muller B, Tamm M. Copeptin, C-reactive protein, and procalcitonin as prognostic biomarkers in acute exacerbation of COPD. *Chest* 2007;131:1058-1067.
10. Muller B, Suess E, Schuetz P, Muller C, Bingisser R, Bergmann A, Stolz D, Tamm M, Morgenthaler NG, Christ-Crain M. Circulating levels of pro-atrial natriuretic peptide in lower respiratory tract infections. *J Intern Med* 2006;260:568-576.
11. Snider RH, Jr., Nylen ES, Becker KL. Procalcitonin and its component peptides in systemic inflammation: immunochemical characterization. *J Investig Med* 1997;45:552-560.
12. Struck J, Morgenthaler NG, Bergmann A. Copeptin, a stable peptide derived from the vasopressin precursor, is elevated in serum of sepsis patients. *Peptides* 2005;26:2500-2504.

## **SUPPLEMENTARY FIGURE LEGEND**

*Figure E1A-C.* Dichotomized Kaplan-Meier 2-year survival curves based on optimized cut-offs for (A) procalcitonin (0.1 µg/L), (B) copeptin (15 pmol/L), and (C) pro-atrial natriuretic peptide (145 pmol/L) in the 594 patients (93.1%) from the PROMISE-COPD cohort who had complete data for these biomarkers. ANP = pro-atrial natriuretic peptide; PCT = procalcitonin.

**SUPPLEMENTARY TABLES**

**TABLE E1. COX REGRESSION MODELS FOR 1-YEAR ALL-CAUSE MORTALITY**

**PREDICTION**

| Variable(s)           | Hazard ratio<br>(95% CI) | <i>P</i> | C<br>statistic | Model<br>chi-<br>square | <i>P</i> |
|-----------------------|--------------------------|----------|----------------|-------------------------|----------|
| Univariate analyses   |                          |          |                |                         |          |
| BODE                  | 3.30 (2.04-5.35)         | <0.001   | 0.745          | 23.24                   | <0.001   |
| BOD                   | 3.74 (1.90-7.34)         | <0.001   | 0.690          | 15.25                   | <0.001   |
| Procalcitonin         | 1.37 (0.94-1.99)         | 0.110    | 0.591          | 2.45                    | 0.117    |
| Copeptin              | 3.30 (2.04-5.35)         | <0.001   | 0.620          | 9.44                    | 0.002    |
| ProANP                | 2.22 (1.31-3.75)         | 0.003    | 0.611          | 8.38                    | 0.004    |
| Multivariate analyses |                          |          |                |                         |          |
| BODE plus:            |                          |          |                |                         |          |
| Procalcitonin         | 1.41 (0.98-2.02)         | 0.070    | 0.739          | 26.34                   | <0.001   |
| Copeptin              | 2.96 (1.38-6.36)         | 0.005    | 0.765          | 31.10                   | <0.001   |
| ProANP                | 2.30 (1.37-3.86)         | 0.002    | 0.774          | 32.90                   | <0.001   |
| BOD plus:             |                          |          |                |                         |          |
| Procalcitonin         | 1.41 (0.97-2.05)         | 0.072    | 0.692          | 18.28                   | <0.001   |
| Copeptin              | 3.36 (1.55-7.25)         | 0.002    | 0.741          | 24.76                   | <0.001   |
| Pro-ANP               | 2.54 (1.49-4.32)         | <0.001   | 0.750          | 26.72                   | <0.001   |

*Definition of abbreviations:* BOD = Body mass, airflow Obstruction, and Dyspnea index; BODE = Body mass, airflow Obstruction, Dyspnea, Exercise capacity index;



ProANP= pro-natriuretic peptide; CI = confidence interval. Increment one quartile for BODE, BOD, and biomarkers. P-values compare variables with hazard ratio=1 or C-statistics=0.5 (null hypothesis).

BOD comprises BODE without the exercise capacity measurement. These three components are scored according to the same cut-offs as is the BODE index.<sup>1</sup> The “BOD index” therefore ranges, in increasing severity, ranging, in increasing severity, from 0 to 7.

**TABLE E2. COX REGRESSION MODELS FOR 2-YEAR ALL-CAUSE MORTALITY PREDICTION**

| Variable(s)           | Hazard ratio<br>(95% CI) | <i>P</i> | C<br>statistic | Model chi-<br>square | <i>P</i> |
|-----------------------|--------------------------|----------|----------------|----------------------|----------|
| Univariate analyses   |                          |          |                |                      |          |
| BODEII                | 2.53 (1.73-3.69)         | <0.001   | 0.679          | 22.07                | <0.001   |
| BODII                 | 3.74 (1.90-7.34)         | <0.001   | 0.649          | 15.26                | <0.001   |
| Procalcitonin         | 1.37 (1.02-1.84)         | 0.030    | 0.607          | 4.16                 | 0.040    |
| Copeptin              | 2.53 (1.73-3.69)         | 0.002    | 0.602          | 9.38                 | 0.002    |
| ProANP                | 2.04 (1.34-3.11)         | 0.001    | 0.609          | 10.63                | 0.001    |
| Multivariate analyses |                          |          |                |                      |          |
| BODE plus:            |                          |          |                |                      |          |
| Procalcitonin         | 1.40 (1.05-1.86)         | 0.020    | 0.697          | 26.98                | <0.001   |
| Copeptin              | 2.28 (1.27-4.11)         | 0.006    | 0.710          | 29.63                | <0.001   |
| ProANP                | 2.07 (1.37-3.12)         | <0.001   | 0.734          | 33.62                | <0.001   |
| BOD plus:             |                          |          |                |                      |          |
| Procalcitonin         | 1.40 (1.05-1.87)         | 0.02     | 0.673          | 20.10                | <0.001   |
| Copeptin              | 2.49 (1.37-4.50)         | 0.003    | 0.696          | 24.24                | 0.001    |
| ProANP                | 2.23 (1.46-3.39)         | <0.001   | 0.718          | 28.85                | <0.001   |

*Definition of abbreviations:* BOD = Body mass, airflow Obstruction, and Dyspnea index; BODE = Body mass, airflow Obstruction, Dyspnea, Exercise capacity index; ProANP= pro-natriuretic peptide; CI = confidence interval. Increment one quartile for BODE, BOD, and biomarkers, P-values compare variables with hazard ratio=1 or C-statistics=0.5 (null hypothesis). BOD comprises BODE without the exercise capacity measurement. These three components are scored according to the same cut-offs as

is the BODE index.<sup>1</sup> The “BOD index” therefore ranges, in increasing severity, ranging, in increasing severity, from 0 to 7.

Figure E1- A.

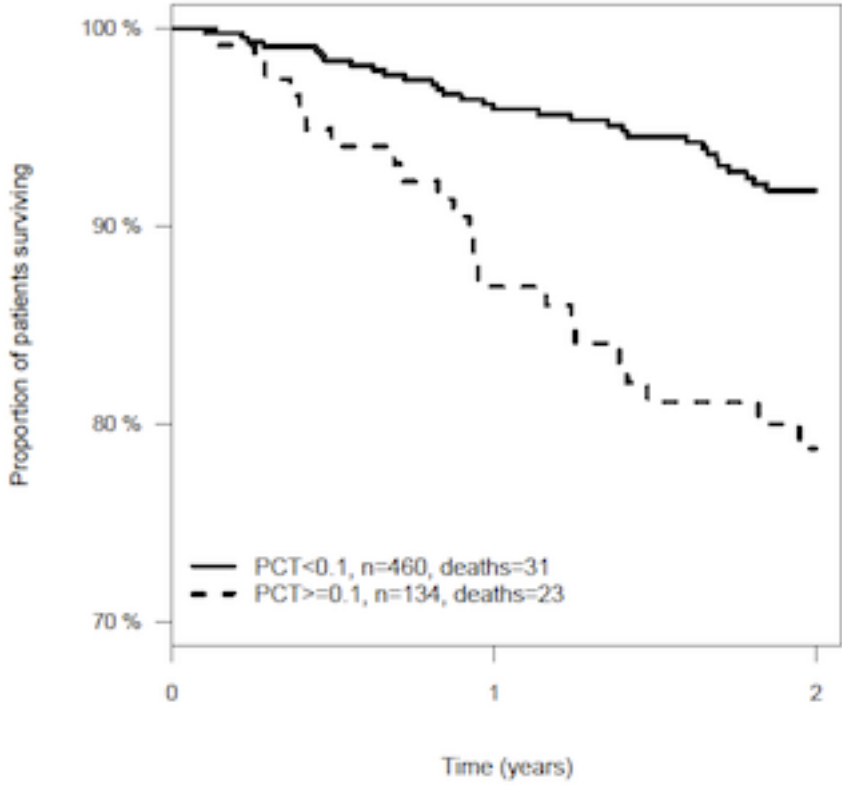

Figure E1- B.

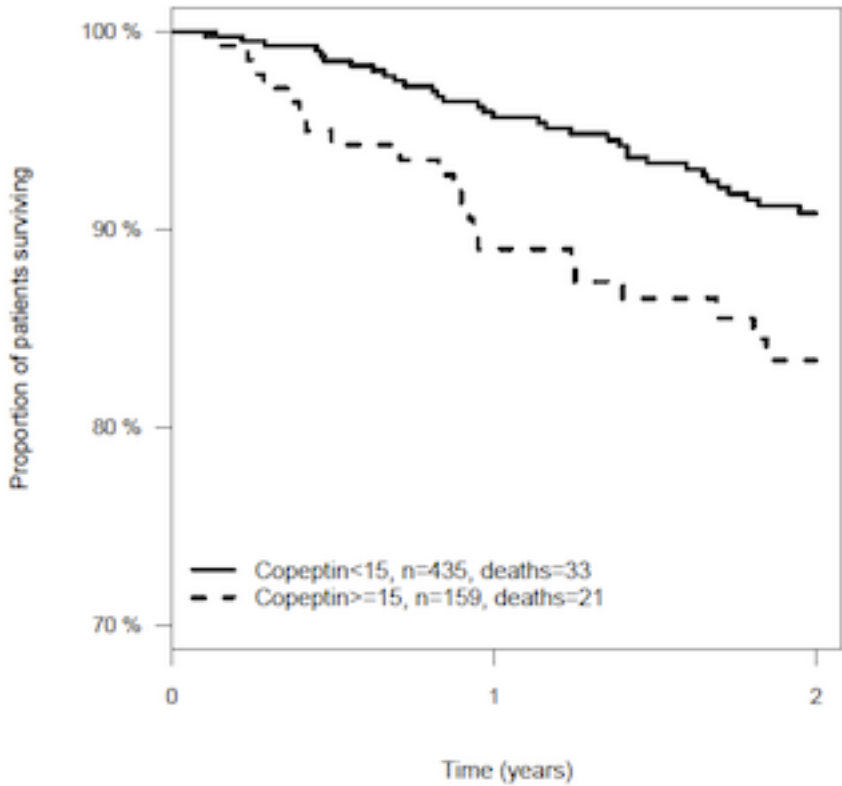

Figure E1- C.

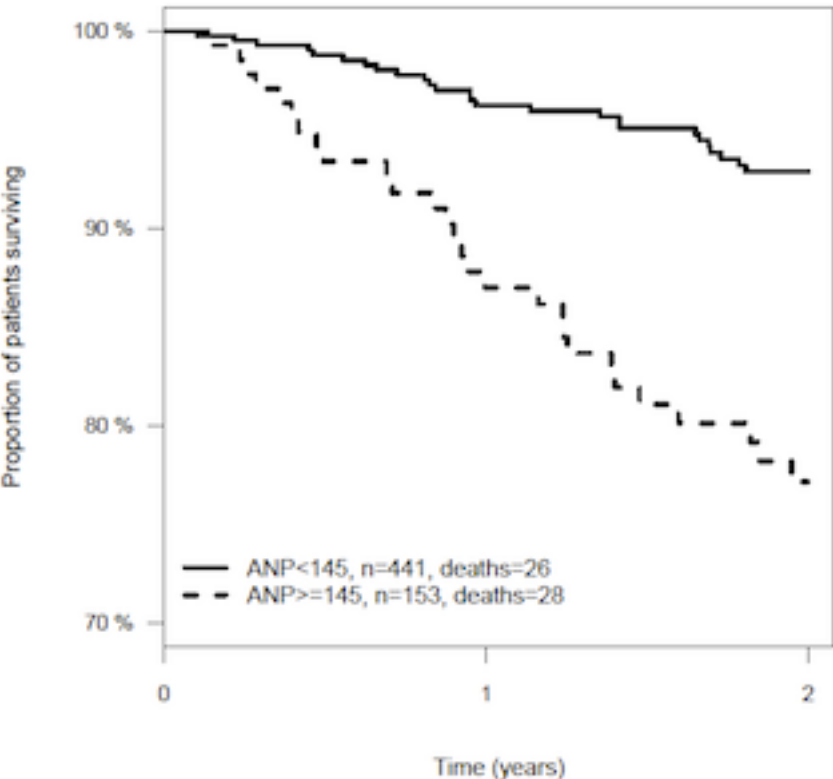

Supplement: Supplementarymateria_revision.pdf [file Supplementarymateria_revision.pdf]
